# Supplementary material
Source: PubMed Central journal article supplement (PMC4167312)
Supplement: NIHMS343147-supplement-01.pdf [file NIHMS343147-supplement-01.pdf]

Current Biology, Volume 21

## Supplemental Information

### SIN-Inhibitory Phosphatase Complex

### Promotes Cdc11p Dephosphorylation and

### Propagates SIN Asymmetry in Fission Yeast

N. Sadananda Singh, Nan Shao, Janel R. McLean, Mayalagu Sevugan, Liping Ren, Ting Gang Chew, Andrea Bimbo, Reetu Sharma, Xie Tang, Kathleen L. Gould, and Mohan K. Balasubramanian

## Supplemental Inventory

**Figure S1**, related to **Figure 1**

**Figure S2**, related to **Figure 2**

**Figure S3**, related to **Figure 3**

**Figure S4**, related to **Figure 1** and **Figure 3**

**Table S1**. List of proteins detected from the mass spectrometric analysis of Csc3 and Paa1 pull-down

**Table S2**. Analysis of the genetic interaction between the SIP components, related to Figures 1 and 3

**Table S3**. Dependencies of the SIP component localization between each other, related to Figures 1 and 3

**Table S4**. List of strains used in this study

### Supplemental Experimental Procedures

Yeast strains and methods

Gene deletion and tagging

Immunoprecipitation and Mass spectrometry of Csc1p-Myc<sub>13</sub>

MS analysis of Csc3p-3xTAP and Paa1p-3xTAP

Pull-down and immunoblotting

Microscopy

### Supplemental References

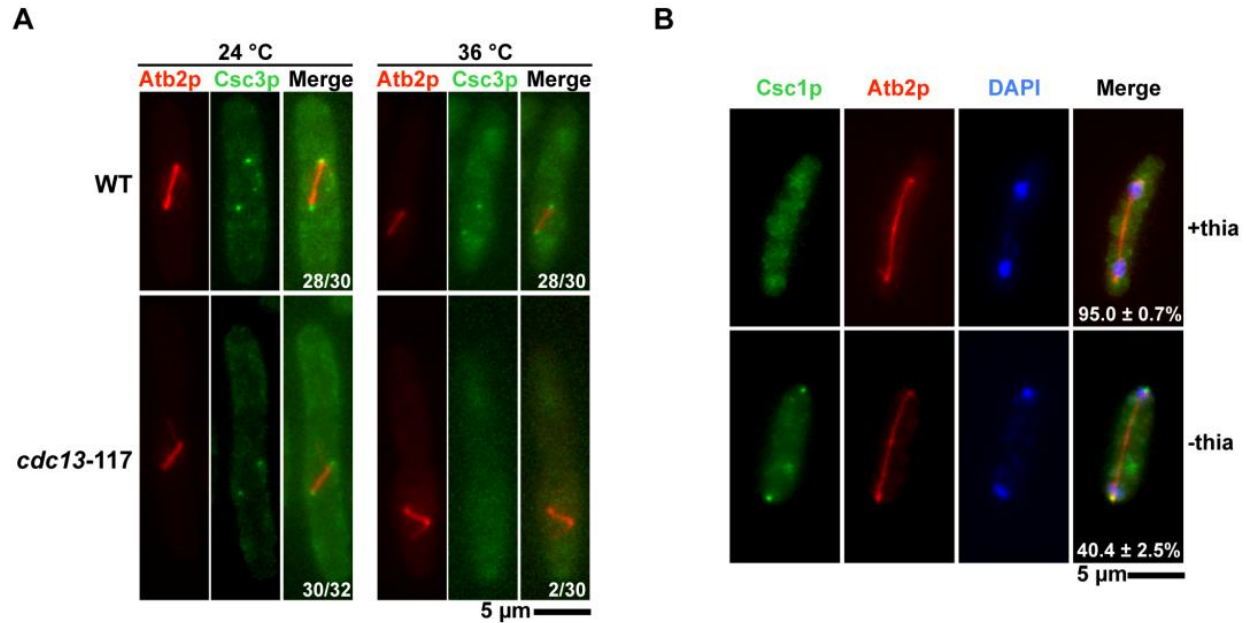

### Figure S1. Localization of Csc1p to SPB Depends on Active Cyclin-Dependent Kinase

(A) Loss of Csc1 localization to SPB on Cdc13p inactivation: Wild-type and *cdc13-117* cells expressing Csc3p-GFP and mCherry-Atb2p were arrested at metaphase by overproduction of Mad2p. Arrested cells were then shifted to 36°C, to inactivate Cdc13p in the *cdc13-117* mutant. Cells at 24°C and 36°C were fixed and the localization of Csc3p in cells with short spindles quantitated. The proportion of cells showing the displayed pattern is indicated at the bottom of the image.

(B) Prolonged maintenance of Csc1p on SPB upon Cdc13p overexpression: A non-degradable form of Cdc13p (Cdc13p $\Delta$ 81) was overexpressed in *csc1-GFP mCherry-atb2* cells and the localization of Csc1p on SPB was observed in cells with a mitotic spindle of at least 5.2 µm. The percentage of cells with Csc1p on SPB was determined (n=50x3).

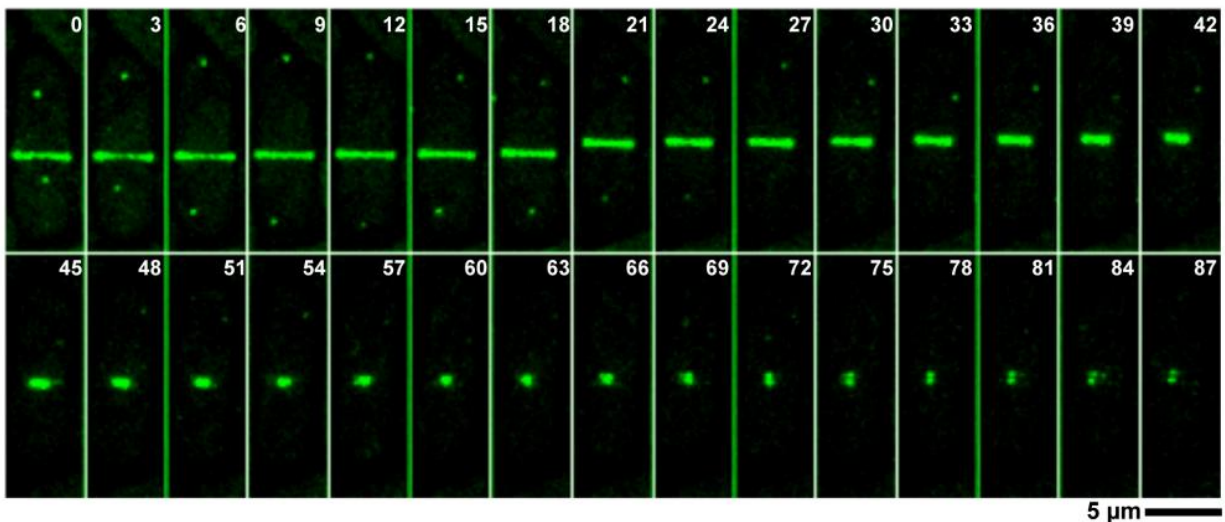

### Figure S2. Cdc7p Is Lost from Both SPBs upon or before Completion of Septation in *csc1*Δ Cells

*csc1*Δ cells expressing Rlc1p-GFP, Cdc7p-GFP and Pcp1p-mCherry were imaged by time-lapse microscopy.

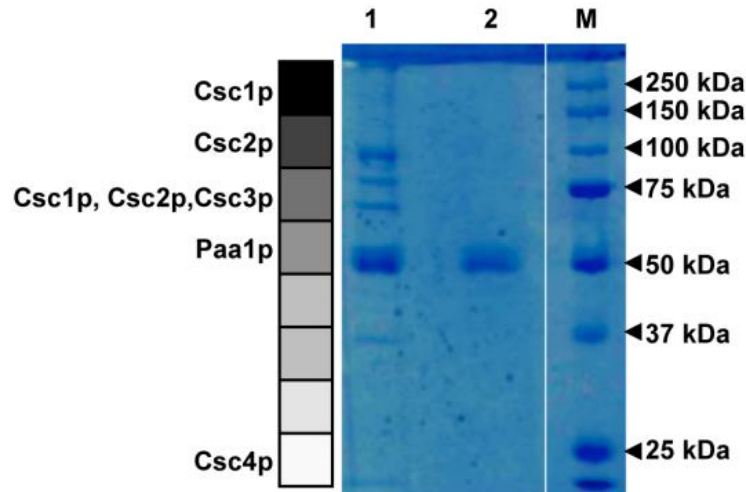

**Figure S3. Immunoaffinity Purification of Csc1p**

Lysates from wild-type cells expressing Csc1p-Myc<sub>13</sub> were generated and incubated with antibodies against the Myc-epitope, immune complexes separated by SDS-PAGE, and stained with Coomassie Blue. A similar gel was segmented into 8 pieces as indicated by the grey scale boxes and subjected to mass spectrometric analysis to identify the proteins. The proteins identified from such gel slices are indicated besides the corresponding boxes. Lane 1 contains immune complex generated from wild-type cells expressing Csc1p-Myc<sub>13</sub>, while Lane 2 contains immune complexes generated from a wild-type strain which did not express the Myc<sub>13</sub>-tagged version of Csc1p.

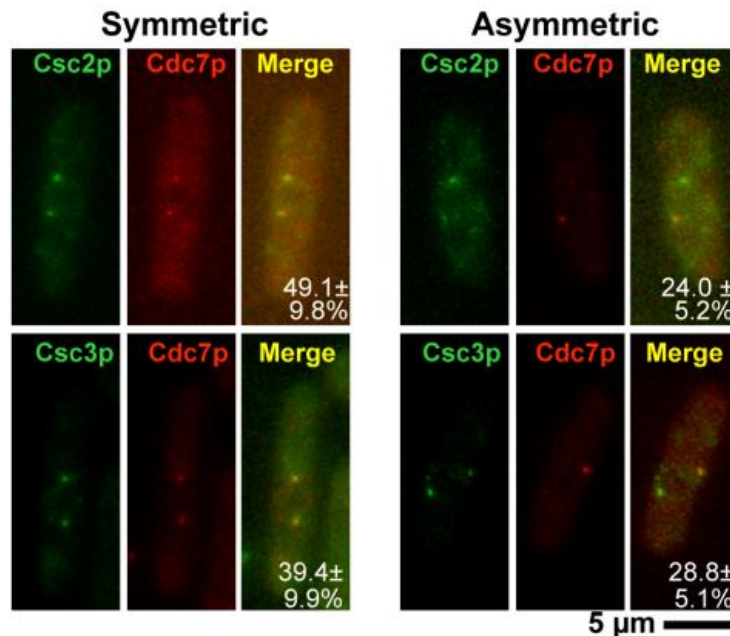

**Figure S4. Csc2p and Csc3p Show a Transient Asymmetry at the SPB before Leaving the SPB**

Wild-type cells expressing Cdc7p-mCherry and either Csc2p-GFP or Csc3p-GFP were grown at 24°C, fixed and then imaged to estimate the proportion of cells with symmetric localization of Csc2p and Csc3p and those with an asymmetric localization of these two proteins (n=50x3).

**Supplemental Table 1. Proteins identified in Csc3-TAP and Paa1-TAP purifications**

| ORF                 | Seq. Cov. (%) | TSC         | Csc3-TAP   |            |            | Paa1-TAP    | Protein     | Description                                                                |
|---------------------|---------------|-------------|------------|------------|------------|-------------|-------------|----------------------------------------------------------------------------|
|                     |               |             | TSC        | Exp1       | Exp2       |             |             |                                                                            |
| <b>SPBC1773.01</b>  | <b>73</b>     | <b>928</b>  | <b>878</b> | <b>478</b> | <b>400</b> | <b>50</b>   | <b>Csc3</b> | <b>striatin homolog</b>                                                    |
| SPBC3H7.13          | 50            | 106         | 100        | 45         | 55         | 6           | Csc1        | FHA domain protein (previously Far10)                                      |
| SPBC27B12.04c       | 26            | 90          | 81         | 37         | 44         | 9           | Csc2        | conserved eukaryotic protein                                               |
| SPAC9.09            | 54            | 177         | 60         | 49         | 11         | 117         | Met26       | homocysteine methyltransferase                                             |
| SPAC1F3.06c         | 25            | 70          | 58         | 29         | 29         | 12          | Spo15       | sporulation protein Spo15                                                  |
| SPAC9E9.09c         | 47            | 65          | 51         | 28         | 23         | 14          |             | aldehyde dehydrogenase                                                     |
| SPBC19C2.07         | 57            | 71          | 43         | 31         | 12         | 28          | Fba1        | fructose-bisphosphate aldolase                                             |
| SPBC660.16          | 31            | 53          | 41         | 34         | 7          | 12          |             | phosphogluconate dehydrogenase, decarboxylating                            |
| SPBC21C3.08c        | 40            | 50          | 38         | 34         | 4          | 12          |             | ornithine aminotransferase                                                 |
| SPBC28F2.03         | 47            | 45          | 37         | 30         | 7          | 8           | Ppi1/Cyp2   | cyclophilin family peptidyl-prolyl cis-trans isomerase                     |
| SPAC26A3.05         | 15            | 46          | 34         | 13         | 21         | 12          | Chc1        | clathrin heavy chain                                                       |
| SPAC110.04c         | 36            | 51          | 34         | 27         | 7          | 17          | Pss1        | heat shock protein                                                         |
| <b>SPAC2C4.10c</b>  | <b>50</b>     | <b>43</b>   | <b>33</b>  | <b>15</b>  | <b>18</b>  | <b>10</b>   | <b>Csc4</b> | <b>sequence orphan</b>                                                     |
| SPAC222.12c         | 36            | 36          | 31         | 18         | 13         | 5           | Atp2        | F1-ATPase beta subunit                                                     |
| SPBC2G5.05          | 26            | 30          | 29         | 20         | 9          | 1           |             | transketolase                                                              |
| SPCC736.15          | 37            | 35          | 28         | 13         | 15         | 7           |             | protein kinase inhibitor associated with endocytosis                       |
| SPBC9B6.04c         | 36            | 26          | 26         | 5          | 21         | 0           | Tuf1        | mitochondrial translation elongation factor EF-Tu                          |
| SPCPB16A4.03c       | 38            | 31          | 25         | 24         | 1          | 6           | Ade10       | IMPcyclohydrolase/phosphoribosylaminoimidazolecarboxamideformyltransferase |
| SPBC336.10c         | 51            | 44          | 25         | 16         | 9          | 19          | Tif512      | translation initiation factor eIF5A                                        |
| SPBC56F2.09c        | 25            | 27          | 25         | 10         | 15         | 2           | Arg5        | arginine specific carbamoyl-phosphate synthase non catalytic subunit       |
| SPBC14F5.03c        | 17            | 36          | 24         | 8          | 16         | 12          | Kap123      | karyopherin                                                                |
| SPBC8D2.18c         | 39            | 29          | 24         | 17         | 7          | 5           |             | adenosylhomocysteinase                                                     |
| SPBC1A4.08c         | 30            | 27          | 24         | 10         | 14         | 3           | Cct3        | chaperonin-containing T-complex gamma subunit                              |
| SPCC24B10.21        | 63            | 35          | 23         | 22         | 1          | 12          | Tpi1        | triosephosphate isomerase                                                  |
| SPAC9.07c           | 30            | 23          | 23         | 8          | 15         | 0           | Rbg1        | GTPase                                                                     |
| <b>SPAP8A3.09c</b>  | <b>79</b>     | <b>2013</b> | <b>22</b>  | <b>7</b>   | <b>15</b>  | <b>1991</b> | <b>Paa1</b> | <b>protein phosphatase regulatory subunit</b>                              |
| SPBC215.05          | 39            | 43          | 19         | 19         | 0          | 24          | Gpd1        | glycerol-3-phosphate dehydrogenase                                         |
| SPBC17D1.06         | 18            | 19          | 19         | 6          | 13         | 0           | Dbp3        | ATP-dependent RNA helicase                                                 |
| SPCC794.12c         | 17            | 23          | 18         | 18         | 0          | 5           | Mae2        | malic enzyme                                                               |
| SPBC1604.05         | 26            | 23          | 18         | 16         | 2          | 5           | Pgi1        | glucose-6-phosphate isomerase                                              |
| SPAC1006.07         | 43            | 66          | 18         | 12         | 6          | 48          |             | translation initiation factor eIF4A                                        |
| SPAC19A8.15         | 26            | 29          | 18         | 10         | 8          | 11          | Trp2        | tryptophan synthase                                                        |
| SPBC146.14c         | 14            | 24          | 18         | 8          | 10         | 6           | Sec26       | coatamer beta subunit                                                      |
| <b>SPAC22H10.04</b> | <b>24</b>     | <b>22</b>   | <b>18</b>  | <b>8</b>   | <b>10</b>  | <b>4</b>    | <b>Ppa3</b> | <b>protein phosphatase type 2A</b>                                         |
| SPCC1322.13         | 19            | 24          | 17         | 7          | 10         | 7           | Ade6        | phosphoribosylaminoimidazole carboxylase                                   |
| SPAC1635.01         | 26            | 20          | 17         | 7          | 10         | 3           |             | voltage-dependent anion-selective channel                                  |

| ORF          | Seq.<br>Cov. (%) | TSC | Csc3-TAP |      |      | Paa1-<br>TAP | Protein | Description                                              |
|--------------|------------------|-----|----------|------|------|--------------|---------|----------------------------------------------------------|
|              |                  |     | TSC      | Exp1 | Exp2 |              |         |                                                          |
| SPCC1020.06c | 56               | 82  | 17       | 16   | 1    | 65           | Tal1    | transaldolase                                            |
| SPAC1F12.02c | 54               | 28  | 17       | 14   | 3    | 11           | P23Fy   | translationally controlled tumor protein homolog         |
| SPAC3C7.08c  | 13               | 22  | 17       | 5    | 12   | 5            | Elf1    | AAA family ATPase                                        |
| SPAP8A3.07c  | 22               | 18  | 16       | 16   | 0    | 2            |         | phospho-2-dehydro-3-deoxyheptonate aldolase              |
| SPBC215.09c  | 44               | 28  | 16       | 15   | 1    | 12           | Erg10   | acetyl-CoA C-acetyltransferase                           |
| SPAC6B12.15  | 27               | 22  | 16       | 14   | 2    | 6            | Cpc2    | RACK1 homologue                                          |
| SPBC428.02c  | 27               | 21  | 16       | 14   | 2    | 5            | Eca39   | branched chain amino acid aminotransferase               |
| SPAC3A11.12c | 38               | 32  | 16       | 8    | 8    | 16           | Rpt5    | 19S proteasome regulatory subunit                        |
| SPAC29A4.15  | 38               | 43  | 16       | 7    | 9    | 27           |         | cytoplasmic serine-tRNA ligase                           |
| SPAC1834.02  | 15               | 34  | 16       | 7    | 9    | 18           | Aro1    | pentafunctional aromatic polypeptide                     |
| SPCC757.09c  | 30               | 22  | 16       | 8    | 8    | 6            | Rnc1    | RNA-binding protein that suppresses calcineurin deletion |
| SPAC20G8.06  | 8                | 18  | 16       | 7    | 9    | 2            | Not1    | CCR4-Not complex subunit                                 |
| SPBC646.09c  | 18               | 24  | 16       | 5    | 11   | 8            | Int6    | eIF3e subunit homolog                                    |
| SPCC1450.04  | 39               | 36  | 15       | 14   | 1    | 21           | Tef5    | translation elongation factor EF-1 beta subunit          |
| SPAC23C11.09 | 18               | 34  | 15       | 11   | 4    | 19           | Ala1    | mitochondrial and cytoplasmic alanine-tRNA ligase        |
| SPBC26H8.07c | 21               | 15  | 15       | 9    | 6    | 0            | Nda3    | tubulin beta                                             |
| SPBC16A3.15c | 15               | 19  | 15       | 5    | 10   | 4            | Nda2    | tubulin alpha 1                                          |
| SPAC23C11.05 | 40               | 16  | 14       | 14   | 0    | 2            |         | inorganic pyrophosphatase                                |
| SPCC645.14c  | 41               | 52  | 14       | 13   | 1    | 38           | Sti1    | chaperone activator                                      |
| SPBC1703.13c | 18               | 16  | 14       | 7    | 7    | 2            |         | mitochondrial inorganic phosphate transporter            |
| SPBC13A2.04c | 11               | 15  | 14       | 4    | 10   | 1            |         | PTR family peptide transporter                           |
| SPCC1840.03  | 11               | 22  | 14       | 5    | 9    | 8            | Sal3    | karyopherin                                              |
| SPCC576.03c  | 47               | 21  | 13       | 13   | 0    | 8            | Tpx1    | thioredoxin peroxidase                                   |
| SPBPJ4664.04 | 14               | 21  | 13       | 9    | 4    | 8            |         | coatamer alpha subunit                                   |
| SPAC21E11.08 | 17               | 25  | 13       | 7    | 6    | 12           | Lcb2    | serine palmitoyltransferase                              |
| SPBC56F2.08c | 9                | 13  | 13       | 6    | 7    | 0            |         | RNA-binding protein                                      |
| SPBC18E5.06  | 30               | 17  | 13       | 7    | 6    | 4            | Rps21   | 40S ribosomal protein S21                                |
| SPBC20F10.01 | 27               | 16  | 13       | 5    | 8    | 3            | Gar1    | snoRNP pseudouridylase complex protein                   |
| SPAC1D4.04   | 26               | 14  | 13       | 4    | 9    | 1            | Cct2    | chaperonin-containing T-complex beta subunit             |
| SPBC8E4.01c  | 12               | 14  | 13       | 3    | 10   | 1            |         | inorganic phosphate transporter                          |
| SPBC215.08c  | 11               | 12  | 12       | 12   | 0    | 0            | Arg4    | arginine specific carbamoyl-phosphate synthase           |
| SPBC1703.10  | 56               | 30  | 12       | 5    | 7    | 18           | Ypt1    | GTPase                                                   |
| SPBC800.05c  | 11               | 14  | 12       | 3    | 9    | 2            | Atb2    | tubulin alpha 2                                          |
| SPCC364.07   | 15               | 11  | 11       | 10   | 1    | 0            |         | D-3 phosphoglycerate dehydrogenase                       |
| SPAC10F6.06  | 61               | 24  | 11       | 9    | 2    | 13           | Vip1    | RNA-binding protein                                      |
| SPBC776.03   | 25               | 11  | 11       | 9    | 2    | 0            |         | homoserine dehydrogenase                                 |
| SPBC337.05c  | 25               | 14  | 11       | 6    | 5    | 3            | Cct8    | chaperonin-containing T-complex theta subunit            |

| ORF           | Seq.     | TSC | Csc3-TAP |      |      | Paa1- | Protein | Description                                      |
|---------------|----------|-----|----------|------|------|-------|---------|--------------------------------------------------|
|               | Cov. (%) |     | TSC      | Exp1 | Exp2 | TAP   |         |                                                  |
| SPAC4F8.07c   | 18       | 11  | 11       | 11   | 0    | 0     | Hxk2    | hexokinase 2                                     |
| SPCC1322.14c  | 14       | 13  | 11       | 7    | 4    | 2     | Vtc4    | vacuolar transporter chaperone                   |
| SPAC20G8.05c  | 13       | 14  | 11       | 6    | 5    | 3     | Cdc15   | cell division control protein                    |
| SPAC20G8.09c  | 8        | 11  | 11       | 4    | 7    | 0     |         | N-acetyltransferase                              |
| SPBC21D10.12  | 20       | 15  | 11       | 3    | 8    | 4     | Hob1    | BAR adaptor protein                              |
| SPAC1F12.07   | 40       | 34  | 10       | 8    | 2    | 24    |         | phosphoserine aminotransferase                   |
| SPAC9E9.07c   | 37       | 15  | 10       | 6    | 4    | 5     | Ypt2    | GTPase                                           |
| SPBC29A10.01  | 14       | 11  | 10       | 5    | 5    | 1     | Ccr1    | NADPH-cytochrome p450 reductase                  |
| SPCC777.09c   | 25       | 10  | 10       | 10   | 0    | 0     | Arg1    | acetylornithine aminotransferase                 |
| SPAPB17E12.05 | 42       | 34  | 10       | 5    | 5    | 24    | Rpl3703 | 60S ribosomal protein L37                        |
| SPBC3D6.02    | 21       | 46  | 9        | 9    | 0    | 37    | But2    | But2 family protein                              |
| SPAC1F5.02    | 22       | 28  | 9        | 9    | 0    | 19    |         | protein disulfide isomerase                      |
| SPAC56F8.05c  | 37       | 21  | 9        | 9    | 0    | 12    | Mug64   | BAR domain protein                               |
| SPCC645.08c   | 19       | 24  | 9        | 7    | 2    | 15    | Snd1    | RNA-binding protein                              |
| SPBC8D2.06    | 9        | 17  | 9        | 7    | 2    | 8     | Irs1    | cytoplasmic isoleucine-tRNA ligase               |
| SPBC16G5.05c  | 20       | 12  | 9        | 5    | 4    | 3     |         | MSP domain                                       |
| SPAC1783.05   | 7        | 9   | 9        | 6    | 3    | 0     | Hrp1    | ATP-dependent DNA helicase                       |
| SPCC550.11    | 11       | 13  | 9        | 5    | 4    | 4     |         | karyopherin                                      |
| SPAC24H6.04   | 23       | 17  | 8        | 7    | 1    | 9     | Hxk1    | hexokinase 1                                     |
| SPBC12C2.06   | 34       | 30  | 8        | 6    | 2    | 22    |         | ATP-dependent RNA helicase                       |
| SPAC17G8.06c  | 7        | 9   | 8        | 6    | 2    | 1     |         | dihydroxy-acid dehydratase                       |
| SPBC106.06    | 20       | 13  | 8        | 5    | 3    | 5     | Cct4    | chaperonin-containing T-complex delta subunit    |
| SPAC27E2.03c  | 27       | 30  | 8        | 8    | 0    | 22    |         | GTP binding protein                              |
| SPAC977.14c   | 22       | 8   | 8        | 8    | 0    | 0     |         | aldo/keto reductase, unknown biological role     |
| SPAC25B8.12c  | 15       | 8   | 8        | 8    | 0    | 0     |         | nucleotide-sugar phosphatase                     |
| SPAC19B12.01  | 7        | 10  | 8        | 5    | 3    | 2     |         | TPR repeat protein, TTC27 family                 |
| SPAC26F1.07   | 20       | 7   | 7        | 7    | 0    | 0     |         | glucose 1-dehydrogenase                          |
| SPAC3C7.14c   | 18       | 7   | 7        | 7    | 0    | 0     | Obr1    | ubiquitinated histone-like protein               |
| SPBC30D10.13c | 33       | 23  | 7        | 6    | 1    | 16    | Pdb1    | pyruvate dehydrogenase e1 component beta subunit |
| SPACUNK4.07c  | 18       | 30  | 7        | 5    | 2    | 23    | Cta4    | P-type ATPase, calcium transporting              |
| SPBC119.01    | 25       | 20  | 7        | 5    | 2    | 13    | Rpn3    | 19S proteasome regulatory subunit                |
| SPCC16C4.07   | 14       | 11  | 7        | 4    | 3    | 4     | Scw1    | RNA-binding protein                              |
| SPBC1703.07   | 34       | 45  | 6        | 5    | 1    | 39    |         | ATP citrate synthase subunit 1                   |
| SPBC3D6.15    | 31       | 73  | 6        | 2    | 4    | 67    | Rps2501 | 40S ribosomal protein S25                        |
| SPBC18E5.02c  | 16       | 17  | 6        | 1    | 5    | 11    |         | serine palmitoyltransferase complex subunit      |
| SPAC22A12.16  | 44       | 64  | 6        | 5    | 1    | 58    |         | ATP-citrate synthase subunit 2                   |
| SPAC1486.04c  | 10       | 24  | 6        | 5    | 1    | 18    | Alm1    | medial ring protein                              |

| ORF           | Seq.     | TSC | Csc3-TAP |      |      | Paa1- | Protein | Description                                                         |
|---------------|----------|-----|----------|------|------|-------|---------|---------------------------------------------------------------------|
|               | Cov. (%) |     | TSC      | Exp1 | Exp2 | TAP   |         |                                                                     |
| SPBC1778.06c  | 28       | 39  | 5        | 5    | 0    | 34    | Fim1    | fimbrin                                                             |
| SPBC17D11.07c | 14       | 27  | 5        | 3    | 2    | 22    | Rpn2    | 19S proteasome regulatory subunit                                   |
| SPAC1834.04   | 18       | 15  | 5        | 0    | 5    | 10    | Hht1    | histone H3 h3.1                                                     |
| SPAC17H9.14c  | 20       | 16  | 5        | 4    | 1    | 11    |         | protein disulfide isomerase                                         |
| SPCC306.09c   | 16       | 17  | 5        | 3    | 2    | 12    | Cap1    | adenylyl cyclase-associated protein                                 |
| SPAC6F6.15    | 42       | 20  | 4        | 3    | 1    | 16    | Ypt5    | GTPase                                                              |
| SPAC222.14c   | 17       | 15  | 4        | 3    | 1    | 11    | Sey1    | GTP binding protein                                                 |
| SPAC22A12.07c | 11       | 14  | 4        | 0    | 4    | 10    | Ogm1    | protein O-mannosyltransferase                                       |
| SPAC6F12.10c  | 15       | 28  | 4        | 4    | 0    | 24    | Ade3    | phosphoribosylformylglycinamide synthase                            |
| SPACUNK4.10   | 28       | 16  | 3        | 3    | 0    | 13    |         | hydroxyacid dehydrogenase                                           |
| SPCC1682.05c  | 32       | 32  | 3        | 1    | 2    | 29    | Srp68   | signal recognition particle subunit                                 |
| SPAC26F1.03   | 25       | 20  | 3        | 3    | 0    | 17    | Pda1    | pyruvate dehydrogenase e1 component alpha subunit                   |
| SPAC30C2.08   | 29       | 19  | 3        | 3    | 0    | 16    |         | conserved fungal protein                                            |
| SPAC27F1.07   | 28       | 36  | 2        | 2    | 0    | 34    |         | dolichyl-diphospho-oligosaccharide-protein glycosyltransferase      |
| SPBC3B9.01    | 32       | 20  | 2        | 2    | 0    | 18    |         | Hsp70 nucleotide exchange factor                                    |
| SPAC23G3.11   | 24       | 17  | 2        | 2    | 0    | 15    | Rpn6    | 19S proteasome regulatory subunit                                   |
| SPAC22H12.01c | 41       | 15  | 2        | 0    | 2    | 13    | Mug35   | sequence orphan                                                     |
| SPAC3C7.11c   | 18       | 59  | 2        | 2    | 0    | 57    | Cnx1    | calnexin                                                            |
| SPBC1921.05   | 15       | 15  | 2        | 2    | 0    | 13    | Ape2    | aminopeptidase                                                      |
| SPAC9E9.04    | 42       | 20  | 1        | 1    | 0    | 19    |         | bcap family homolog                                                 |
| SPAPYUK71.03c | 9        | 15  | 1        | 1    | 0    | 14    |         | C2 domain protein                                                   |
| SPBC365.13c   | 18       | 12  | 1        | 1    | 0    | 11    | Hba1    | Ran GTPase binding protein                                          |
| SPBC12C2.08   | 14       | 15  | 1        | 0    | 1    | 14    | Dnm1    | dynamain                                                            |
| SPAC607.05    | 12       | 11  | 1        | 0    | 1    | 10    | Rpn9    | 19S proteasome regulatory subunit                                   |
| SPBC16H5.07c  | 84       | 522 | 1        | 1    | 0    | 521   | Ppa2    | serine/threonine protein phosphatase                                |
| SPAC823.15    | 62       | 369 | 1        | 1    | 0    | 368   | Ppa1    | minor serine/threonine protein phosphatase                          |
| SPCC1322.16   | 24       | 22  | 1        | 1    | 0    | 21    | Phb2    | prohibitin                                                          |
| SPAC1142.04   | 11       | 15  | 1        | 1    | 0    | 14    |         | Noc complex subunit Noc2 family                                     |
| SPCC188.02    | 54       | 906 | 0        | 0    | 0    | 906   | Par1    | protein phosphatase regulatory subunit                              |
| SPAC227.07c   | 56       | 337 | 0        | 0    | 0    | 337   | Pab1    | protein phosphatase regulatory subunit                              |
| SPAC1782.05   | 44       | 64  | 0        | 0    | 0    | 64    |         | phosphotyrosyl phosphatase activator homolog                        |
| SPAC31F12.01  | 33       | 63  | 0        | 0    | 0    | 63    | Zds1    | zds family protein phosphatase type A regulator                     |
| SPCC338.15    | 24       | 25  | 0        | 0    | 0    | 25    |         | dolichyl-di-phosphooligosaccharide-protein glycotransferase subunit |
| SPAC3H8.04    | 28       | 24  | 0        | 0    | 0    | 24    |         | chromosome segregation protein                                      |
| SPAC6F12.12   | 20       | 24  | 0        | 0    | 0    | 24    | Par2    | protein phosphatase regulatory subunit                              |
| SPBC365.12c   | 14       | 19  | 0        | 0    | 0    | 19    | Ish1    | LEA domain protein                                                  |
| SPAC18G6.06   | 28       | 18  | 0        | 0    | 0    | 18    | Utp11   | U3 snoRNP-associated protein                                        |

| ORF          | Seq.<br>Cov. (%) | TSC | Csc3-TAP |      |      | Paa1-<br>TAP | Protein | Description                                               |
|--------------|------------------|-----|----------|------|------|--------------|---------|-----------------------------------------------------------|
|              |                  |     | TSC      | Exp1 | Exp2 |              |         |                                                           |
| SPAC22F8.05  | 12               | 17  | 0        | 0    | 0    | 17           |         | alpha,alpha-trehalose-phosphate synthase                  |
| SPCC1393.12  | 43               | 16  | 0        | 0    | 0    | 16           |         | sequence orphan                                           |
| SPAC1705.03c | 9                | 15  | 0        | 0    | 0    | 15           |         | conserved fungal family                                   |
| SPAC1786.02  | 12               | 14  | 0        | 0    | 0    | 14           |         | phospholipase                                             |
| SPBC3F6.02c  | 18               | 14  | 0        | 0    | 0    | 14           |         | 3 beta-hydroxysteroid dehydrogenase/delta 5-->4-isomerase |
| SPBC582.07c  | 17               | 13  | 0        | 0    | 0    | 13           | Rpn7    | 19S proteasome regulatory subunit                         |
| SPAPB1A10.08 | 17               | 12  | 0        | 0    | 0    | 12           |         | sequence orphan                                           |
| SPBC3E7.02c  | 49               | 12  | 0        | 0    | 0    | 12           | Hsp16   | heat shock protein                                        |
| SPCC1183.02  | 21               | 12  | 0        | 0    | 0    | 12           |         | glutathione S-transferase                                 |
| SPCC1235.14  | 12               | 12  | 0        | 0    | 0    | 12           | Ght5    | hexose transporter                                        |
| SPAC2G11.07c | 14               | 11  | 0        | 0    | 0    | 11           | Ptc3    | protein phosphatase 2C                                    |
| SPAC4G9.11c  | 17               | 11  | 0        | 0    | 0    | 11           | Cmb1    | cytosine-mismatch binding protein 1                       |
| SPBP4H10.17c | 14               | 11  | 0        | 0    | 0    | 11           |         | carboxyl methyl esterase                                  |

Key:

Baits are bold

components of the SIP-complex are highlighted in yellow

TSC = total spectral counts

Exp = experiment



**Table S2. Localization Dependencies of the SIP-Complex Components**

|          | <i>csc1Δ</i>   | <i>csc2Δ</i>   | <i>csc3Δ</i>   | <i>Csc4Δ</i>   | <i>paa1</i><br>L566P | <i>ppa3Δ</i>   |
|----------|----------------|----------------|----------------|----------------|----------------------|----------------|
| Csc1-GFP | -              | x              | x              | x              | NA                   | x              |
| Csc2-GFP | x              | -              | x              | x              | NA                   | x              |
| Csc3-GFP | x              | x              | -              | x              | x                    | x              |
| Paa1-GFP | x <sup>p</sup> | x <sup>p</sup> | x <sup>p</sup> | x <sup>p</sup> | -                    | x <sup>p</sup> |

(-) Not relevant, (x) does not localize to SPB(s), (NA) not analyzed, (x<sup>p</sup>)-partial localization in some cells.

**Table S3. Percentage of SIN-Hyperactivated Cells in the Csc Double-Deletion Mutants**

|                              | <i>csc1Δ</i><br>(1.8±0.5) | <i>csc2Δ</i><br>(0.9±0.3) | <i>csc3Δ</i><br>(1.4±0.5) | <i>csc4Δ</i><br>(0.5±0.5) | <i>ppa3Δ</i><br>(0.1±0.1) |
|------------------------------|---------------------------|---------------------------|---------------------------|---------------------------|---------------------------|
| <i>csc2Δ</i> (0.9±0.3)       | 4.6±0.8                   |                           |                           |                           |                           |
| <i>csc3Δ</i> (1.4±0.5)       | 1.3±0.3                   | 3.6±0.8                   |                           |                           |                           |
| <i>csc4Δ</i> (0.5±0.5)       | 1.5±0.4                   | 1.3±0.5                   | 1.3±0.1                   |                           |                           |
| <i>ppa3Δ</i> (0.1±0.1)       | 1.4±0.3                   | 0.4±0.3                   | 1.5±0.7                   | 1.6±0.7                   |                           |
| <i>paa1</i> -L566P (4.5±0.6) | 2.0±0.6                   | 6.4±0.8                   | 5.8±0.4                   | 4.8±1                     | 4.8±2.6                   |

Table S4: Strains and plasmids used in this study

|          |                                                                                               |            |
|----------|-----------------------------------------------------------------------------------------------|------------|
| MBY102   | <i>ade6-210 ura4-D18 leu1-32 h<sup>+</sup></i>                                                | Lab stock  |
| MBY4336  | <i>csc1Δ:: ura4<sup>+</sup> leu1-32 ura4-D18 h<sup>-</sup></i>                                | This study |
| MBY5886  | <i>csc1Δ:: ura4<sup>+</sup> leu1-32 ura4-D18 h<sup>+</sup></i>                                | This study |
| MBY286   | <i>cdc16-116 leu1-32 ura4-D18 ade6-M210 h<sup>+</sup></i>                                     | [13]       |
| MBY2415  | <i>cdc7-GFP::ura4<sup>+</sup> ade6-21x leu1-32 ura4-D18 his3-D1 h<sup>+</sup></i>             | Lab stock  |
| MBY604-1 | <i>sid1-GFP:: ura4<sup>+</sup> ade6-210 leu1-32 h<sup>+</sup></i>                             | Lab stock  |
| MBY6193  | <i>kanMX-nmt1-csc1-GFP:: ura4<sup>+</sup> ura4-D18</i>                                        | This study |
| MBY4310  | <i>csc1-GFP:: ura4<sup>+</sup> leu1-32 ura4-D18 h<sup>-</sup></i>                             | This study |
| MBY5856  | <i>mCherry-atb2::hph leu1-32 ura4-D18 h<sup>-</sup></i>                                       |            |
| MBY6964  | <i>csc1-GFP:: ura4<sup>+</sup> mCherry-atb2::hph leu1-32 ura4-D18 h<sup>-</sup></i>           | This study |
| MBY6965  | <i>csc1-GFP:: ura4<sup>+</sup> mCherry-atb2::hph leu1-32 ura4-D18 h<sup>+</sup></i>           | This study |
| MBY6968  | <i>cdc25-22 csc1::gfp-ura4+ mCherry-atb2::hph leu1-32 ura4-D18 h<sup>-</sup></i>              | This study |
| MBY7085  | <i>sid4-SA1 csc1-GFP:: ura4<sup>+</sup> mCherry-atb2:hph h<sup>+</sup></i>                    | This study |
| MBY7016  | <i>cdc25-22 csc1-GFP:: ura4<sup>+</sup> cdc7-mCherry:kanMx</i>                                | This study |
| MBY7357  | <i>nda3-KM311 csc1-GFP:: ura4<sup>+</sup> mCherry-atb2::hph</i>                               | This study |
| MBY6569  | <i>csc1Δ::ura4<sup>+</sup> cdc7-GFP:: ura4<sup>+</sup> mCherry-atb2::hph leu1-32 ura4-D18</i> | This study |
| MBY5887  | <i>sid1-GFP:: ura4<sup>+</sup> csc1Δ::ura4+ leu1-32</i>                                       | This study |
| MBY4627  | <i>cdc16-116 csc1Δ::ura4<sup>+</sup></i>                                                      | This study |
| MBY6361  | <i>csc3-GST::kanMx csc1-myc<sub>13</sub>::KanMx ade6-210 ura4-D18 leu1-32</i>                 | This study |
| MBY6363  | <i>csc2-GST::KanMx csc1- myc<sub>13</sub>::KanMx ade6-210 ura4-D18 leu1-32</i>                | This study |
| MBY6332  | <i>paa1-GST::kanMx csc1- myc<sub>13</sub>::kanMx ade6-210 ura4-D18 leu1-32</i>                | This study |
| MBY6911  | <i>csc3-GFP::KanMx mCherry-atb2::hph leu1-32 ura4-D18 h<sup>+</sup></i>                       | This study |
| MBY 7353 | <i>csc2-GFP::kanMx mCherry-atb2::hph leu1-32 ura4-D18</i>                                     | This study |
| MBY7329  | <i>paa1-GFP::kanMx mCherry-atb2::hph ade6-210 ura4-D18 leu1-32 h<sup>+</sup></i>              | This study |
| MBY6336  | <i>csc3Δ::kanMx ade6-210 ura4-D18 leu1-32 h<sup>+</sup></i>                                   | This study |
| MBY6339  | <i>csc2Δ::KanMx ade6-210 ura4-D18 leu1-32 h<sup>+</sup></i>                                   | This study |
| MBY6341  | <i>csc4Δ:: ura4<sup>+</sup> ade6-210 leu1-32 ura4-D18 h<sup>+</sup></i>                       | This study |
| MBY6386  | <i>csc2Δ::kanMx cdc16-116 ade6-210 ura4-D18 leu1-32</i>                                       | This study |
| MBY6385  | <i>csc3Δ::kanMx cdc16-116 ade6-210 ura4-D18 leu1-32</i>                                       | This study |
| MBY6389  | <i>csc4Δ::ura4<sup>+</sup> cdc16-116 ade6-210 ura4-D18 leu1-32</i>                            | This       |
|          | Study                                                                                         |            |
| MBY6643  | <i>paa1-L566P-his5+::ura4<sup>+</sup> his5Δ ura4D-18 leu1-32 h<sup>+</sup></i>                | This study |
| MBY7206  | <i>cdc16-116 paa1-L566P-his5+::ura4<sup>+</sup> ura4-D18 leu1-32</i>                          | This study |
| MBY6471  | <i>csc2Δ::kanMx cdc7-GFP::ura4<sup>+</sup> mcherryatb2::hph</i>                               | This study |

Table S4 contd.

|          |                                                                                                                                    |                |
|----------|------------------------------------------------------------------------------------------------------------------------------------|----------------|
| MBY6926  | <i>paa1-L566P-his5+::ura4<sup>+</sup> mCherry-atb2::hph cdc7-GFP::ura4+</i>                                                        | This study     |
| MBY7358  | <i>csc3Δ::kanMx cdc7-GFP::ura4<sup>+</sup> mCherry-atb2::hph leu1-32 ura4-D18</i>                                                  | This study     |
| MBY6571  | <i>csc4Δ::ura4<sup>+</sup> cdc7-gfp::ura4 mCherry-atb2::hph ura4-D18 leu1-32</i>                                                   | This study     |
| MBY7352  | <i>ppa3Δ::kanMx cdc7-GFP::ura4<sup>+</sup> mCherry-atb2::Hph leu1-32 ura4-D18 h<sup>-</sup></i>                                    | This study     |
| MBY6647  | <i>cdc11- myc<sub>13</sub>::kanMx ade6-M210 ura4-D18 leu1-32 h<sup>-</sup></i>                                                     | [14]           |
| MBY6772  | <i>cdc11-myc::kanMx csc1Δ::ura4<sup>+</sup> leu1-32 ura4-D18 h<sup>+</sup></i>                                                     | This study     |
| MBY603-1 | <i>cdc7-3xHA::ura4<sup>+</sup> leu1-32 h<sup>+</sup></i>                                                                           | Lab stock      |
| MBY5717  | <i>csc1Δ::ura4<sup>+</sup> cdc7-3xHA::ura4<sup>+</sup> leu1-32 ura4-D18</i>                                                        | This study     |
| MBY6648  | <i>cdc11-136 ura4-D18 leu1-32 h<sup>-</sup></i>                                                                                    | Lab stock      |
| MBY7007  | <i>cdc11-136 csc4Δ::ura4<sup>+</sup> ura4-D18 leu1-32</i>                                                                          | This study     |
| MBY7008  | <i>cdc11-136 csc1Δ::ura4<sup>+</sup> ura4-D18 leu1-32</i>                                                                          | This study     |
| MBY7345  | <i>csc3-3xTAP::kanMx ade6-210 ura4-D18 leu1-32 h<sup>+</sup></i>                                                                   | This study     |
| KGY10015 | <i>paa1-linker-TAP::kan<sup>R</sup> ade6-M210 leu1-32 ura4-D18 h<sup>-</sup></i>                                                   | This study     |
| MBY6169  | <i>csc1-myc<sub>13</sub>::kanMx ura4-D18 leu1-32</i>                                                                               | This study     |
| MBY6935  | <i>cdc7-mCherry:kanMx leu1-32 ura4-D18 ade6-210 h<sup>-</sup></i>                                                                  | This study     |
| MBY7415  | <i>ppa3Δ::kanMx ura4-D18 leu1-32 h<sup>-</sup></i>                                                                                 | This study     |
| MBY7723  | <i>cdc7-GFP::ura4<sup>+</sup> csc1Δ::ura4<sup>+</sup> rlc1-3GFP::KanMx</i>                                                         | This study     |
| MBY7654  | <i>cdc13-117 csc3-GFP::KanMx mCherry-atb2::hph leu1-32 ura4-D18</i>                                                                | This study     |
| MBY7642  | <i>csc3-GFP::kanMx cdc7-mCherry::kanMx leu1-32 ura4-D18 ade6-210</i>                                                               | This study     |
| MBY7355  | <i>csc2-GFP::kanMx cdc7-mCherry::kanMx leu1-32 ura4-D18 ade6-210</i>                                                               | This study     |
| MBY7650  | <i>kanMx::nmt81-ppc89 csc1-GFP::ura4<sup>+</sup> mCherry-atb2::hph leu1-32 ura4-D18</i>                                            | This study     |
| MBY7656  | <i>cdc16-116 csc1-GFP::ura4<sup>+</sup> mCherry-atb2::hph leu1-32 ura4-D18</i>                                                     | This study     |
| MBY7543  | <i>h<sup>+</sup>lh<sup>-</sup> ppc89Δ::ura4<sup>+</sup>lppc89<sup>+</sup>ade6-M210/ade6-M216 ura4-D18/ura4-D18 leu1-32/leu1-32</i> | Rosenberg [15] |
| MBY7657  | <i>h<sup>+</sup>/h-ppc89Δ::ura4<sup>+</sup>/ppc89<sup>+</sup>ade6-M210/ade6-M216 csc3-GFP::kanMx mCherry-atb2::hph ura4-D18</i>    | This study     |
| MBY7447  | <i>ppa1Δ::ura4<sup>+</sup> leu1-32 ura4-D18 h<sup>-</sup></i>                                                                      | [16]           |
| MBY7448  | <i>ppa2Δ::ura4<sup>+</sup> leu1-32 ura4-D18 h<sup>-</sup></i>                                                                      | [16]           |
| MBY7658  | <i>ppa1Δ::ura4<sup>+</sup> ppa3Δ::kanMx ura4-D18 leu1-32</i>                                                                       | This study     |
| MBY7659  | <i>ppa2Δ::ura4<sup>+</sup> ppa3Δ::kanMx ura4-D18 leu1-32</i>                                                                       | This study     |
| MBY7482  | <i>ppa1Δ::ura4<sup>+</sup> cdc7-mCherry:kanMx leu1-32 ura4-D18 ade6-M210 h<sup>+</sup></i>                                         | This study     |
| MBY7483  | <i>ppa2Δ::ura4<sup>+</sup> cdc7-mCherry:kanMx leu1-32 ura4-D18 ade6-210 h<sup>+</sup></i>                                          | This study     |
| MBY7348  | <i>nda3-KM311 csc3-3XTAP::kanMx ura4-D18</i>                                                                                       | This study     |
| MBY7644  | <i>nda3-KM311 cdc11-myc<sub>13</sub>::kanMx csc1Δ::ura4<sup>+</sup></i>                                                            | This study     |

Table S4 contd.

|         |                                                                                                                  |            |
|---------|------------------------------------------------------------------------------------------------------------------|------------|
| MBY7324 | <i>kanMx-nmt1-csc1-GFP::ura4<sup>+</sup>cdc7-mCherry::kanMx</i>                                                  | This study |
| MBY7660 | <i>kanMX-nmt1-csc1-GFP::ura4<sup>+</sup>myc<sub>13</sub>-sid1::ura4<sup>+</sup><br/>ura4-D18</i>                 | This study |
| MBY6380 | <i>csc2Δ::kanMx csc1Δ::ura4<sup>+</sup> ade6-M210<br/>ura4-D18 leu1-32</i>                                       | This study |
| MBY6378 | <i>csc3Δ::ura4<sup>+</sup> csc1Δ::ura4<sup>+</sup> ade6-M210<br/>ura4-D18 leu1-32</i>                            | This study |
| MBY7661 | <i>csc1Δ::ura4<sup>+</sup> csc4Δ::ura4<sup>+</sup> leu1-32 ura4-D18</i>                                          | This study |
| MBY7476 | <i>ppa3Δ::kanMx csc1Δ::ura4<sup>+</sup> ura4-D18 leu1-32 h<sup>+</sup></i>                                       | This study |
| MBY7478 | <i>csc1Δ::ura4<sup>+</sup> paa1-L566P-his5<sup>+</sup>::ura4<sup>+</sup><br/>ura4-D18 leu1-32 h<sup>+</sup></i>  | This study |
| MBY7662 | <i>csc2Δ::KanMx csc3Δ::kanMx ura4-D18</i>                                                                        | This study |
| MBY7663 | <i>csc2Δ::KanMx csc3Δ::kanMx ura4-D18</i>                                                                        | This study |
| MBY7663 | <i>csc2Δ::KanMx csc4Δ::ura4<sup>+</sup> ura4-D18 leu1-32</i>                                                     | This study |
| MBY7664 | <i>csc2Δ::KanMx ppa3Δ::kanMx ura4-D18 leu1-32</i>                                                                | This study |
| MBY7208 | <i>paa1-L566P-his5<sup>+</sup>::ura4<sup>+</sup> csc2Δ::KanMx ura4-D18<br/>leu1-32</i>                           | This study |
| MBY7665 | <i>csc4Δ:: ura4<sup>+</sup> csc3Δ::kanMx ura4-D18 leu1-32</i>                                                    | This study |
| MBY766  | <i>csc3Δ::kan ppa3Δ::kanMx ura4-D18</i>                                                                          | This study |
| MBY6927 | <i>paa1-L566P::his5<sup>+</sup>-ura4<sup>+</sup> csc3Δ:: kan ura4-D18 h<sup>+</sup></i>                          | This study |
| MBY7667 | <i>csc4Δ::ura4<sup>+</sup> ppa3Δ::kanMx ura4-D18 leu1-32</i>                                                     | This study |
| MBY7091 | <i>paa1- L566P-his5<sup>+</sup>::ura4<sup>+</sup> csc4Δ::ura4<sup>+</sup><br/>ura4-D18 leu1-32 h<sup>+</sup></i> | This study |
| MBY7668 | <i>ppa3Δ::kanMx paa1-L566P-his5<sup>+</sup>::ura4<sup>+</sup><br/>ura4-D18 leu1-32</i>                           | This study |
| MBY7669 | <i>csc2-GFP::kanMx mcherry-atb2::hph csc1Δ::ura4<sup>+</sup><br/>ura4-D18 h<sup>+</sup></i>                      | This study |
| MBY7670 | <i>csc1Δ::ura4<sup>+</sup> csc3-GFP::KanMx mCherry-atb2::hph<br/>leu1-32 ura4-D18 h<sup>-</sup></i>              | This study |
| MBY     | <i>csc1Δ::ura4<sup>+</sup> paa1-GFP::KanMx</i>                                                                   | This study |
| MBY7671 | <i>csc2Δ::KanMx csc1-GFP::ura4<sup>+</sup> mCherry-atb2::hph<br/>leu1-32 ura4-D18</i>                            | This study |
| MBY7672 | <i>csc2Δ::KanMx csc3-GFP::KanMx mCherry-Atb2::hph<br/>leu1-32 ura4-D18</i>                                       | This study |
| MBY7673 | <i>csc2Δ::KanMx paa1-GFP::kanMx ura4-D18</i>                                                                     | This study |
| MBY6899 | <i>csc3Δ::kanMx csc1-GFP::ura4<sup>+</sup> ura4-D18 leu1-32 h<sup>+</sup></i>                                    | This study |
| MBY7675 | <i>csc3Δ::kanMx csc2-GFP::kanMx mCherry-atb2::hph<br/>leu1-32 ura4-D18</i>                                       | This study |
| MBY7676 | <i>csc3Δ::kanMx paa1-GFP::kanMx ura4-D18</i>                                                                     | This study |
| MBY7677 | <i>ppa3Δ::kanMx csc1-GFP::ura4<sup>+</sup> mCherry-atb2::hph<br/>leu1-32 ura4-D18 h<sup>-</sup></i>              | This study |
| MBY7455 | <i>ppa3Δ::kanMx csc2-GFP::kan mCherry-atb2::hph<br/>ura4-D18 leu1-32 h<sup>-</sup></i>                           | This study |

Table S4 contd.

|                 |                                                                                              |            |
|-----------------|----------------------------------------------------------------------------------------------|------------|
| MBY7456         | <i>ppa3Δ::kanMx csc3-GFP::Kan mCherry-atb2::hph leu1-32 ura4-D18 h<sup>-</sup></i>           | This study |
| MBY7678         | <i>ppa3Δ::kanMx paa1-GFP::kanMx mCherry-atb2::hph ura4-D18 leu1-32 h<sup>-</sup></i>         | This study |
| MBY7679         | <i>paa1-L566P-his5+::ura4<sup>+</sup> csc2-gfp::KanMx mCherry-atb2::hph leu1-32 ura4-D18</i> | This study |
| MBY7696         | <i>csc1-GFP::ura4<sup>+</sup> mCherry-atb2::hph csc4Δ::ura4<sup>+</sup> leu1-32 ura4-D18</i> | This study |
| MBY7698         | <i>csc2-GFP::kanMx mCherry-atb2::hph csc4Δ::ura4<sup>+</sup> leu1-32 ura4-D18</i>            | This study |
| MBY7700         | <i>csc3-GFP::KanMx mCherry-atb2::hph csc4Δ::ura4<sup>+</sup> leu1-32 ura4-D18</i>            | This study |
| MBY7702         | <i>paa1-GFP::kanMx mCherry-atb2::hph csc4Δ::ura4<sup>+</sup> ade6-210 leu1-32 ura4-D18</i>   | This study |
| MBY7721         | <i>nda3-KM311 cdc11-myc<sub>13</sub>::kanMx ade6-M21x ura4-D18 leu1-32</i>                   | This study |
| MBY7644         | <i>nda3-KM311 cdc11-myc<sub>13</sub>::kanMx csc1Δ::ura4<sup>+</sup> ura4-D18 leu1-32</i>     | This study |
| <b>plasmids</b> |                                                                                              |            |
| pCDL1529        | pREP41-GST                                                                                   | This study |
| pCDL514         | pREP1- <i>mad2</i>                                                                           | Lab stock  |
| pCDL1553        | pREP41- <i>csc1</i> -GST                                                                     | This study |
| pCDL834         | pREP41- <i>cdc13Δ81</i>                                                                      | Lab stock  |

## Supplemental Experimental Procedures

### Yeast Strains and Methods

The yeast strains used in this study are listed in Table S4. Standard fission yeast media, growth conditions and manipulations were employed as previously described [1]. Induction of gene expression from the *nmt* promoter [2] was achieved by growing the cells in thiamine containing medium (repressing condition), washed three times in medium lacking thiamine and grown for another 16 hr or as indicated in the medium lacking thiamine. All experiments involving temperature sensitive strains were done at permissive temperature 24°C and the restrictive temperature of 36°C unless otherwise indicated. Standard genetic and recombinant DNA methods were used as described previously [1, 3]. Yeast transformations were carried out using lithium acetate method [4].

### Gene Deletion and Tagging

PCR-based gene targeting method was used to generate the deletion mutants as well as to tag the genes with GFP or GST or Myc<sub>13</sub> or 3xHA. Deletion mutants of *csc1* and *csc4* were generated by replacing the coding region with an *ura4<sup>+</sup>* cassette [4] while *csc2*, *csc3* and *ppa3* were replaced with a kanamycin resistance cassette. The tagged derivatives *csc1-myc<sub>13</sub>*, *csc2-GST*, *csc2-GFP*, *csc3-GFP*, *csc3-GST*, *paa1-GST*, *paa1-GFP* and *csc3-3xTAP* were generated using *myc<sub>13</sub>::kanMx*, *GST::kanMx*, *GFP::kanMx* and *3xTAP::kanMx* cassettes as previously described [5] while *csc1-GFP* was generated by using *GFP::ura4<sup>+</sup>* cassette [4]. The native promoter of *csc1* was replaced with the thiamine repressible *nmt1* promoter in wild type and *csc1-GFP* to generate the *nmt1-csc1* and *nmt1-csc1-GFP* strains respectively. Similarly, the native promoter of *ppc89* was replaced with the *nmt81* promoter to generate the *ppc89* shut off strain. Further, the temperature sensitive *paa1-L566P* mutant was isolated using the fragment switch method as described earlier [6].

### Immunoprecipitation and Mass spectrometry of Csc1p-Myc<sub>13</sub>

Immunoprecipitation was performed as described earlier [7] except using NP40 buffer (1% NP-40, 150 mM NaCl, 2 mM EDTA, 6 mM Na<sub>2</sub>HPO<sub>4</sub>, 4 mM NaH<sub>2</sub>PO<sub>4</sub>). Briefly, cell extracts were prepared by glass bead disruption and solubilized in NP40 buffer containing complete protease inhibitors (Roche Diagnostics) and 1.5 µg/ml of PMSF. Cell extracts were then clarified by centrifugation at 14,000 rpm for 10 min at 4°C. To immunoprecipitate protein complex, 500 µl of soluble protein was incubated with 5 µl of the appropriate antibodies for 1–2 h at 4°C. Protein A-Sepharose beads (100 µl, Amersham Biosciences) were then added to the antigen-antibody immunocomplex and incubated for 45 min at 4°C. After six washes with NP40 buffer, the protein A-immune complex was treated with 1mM DTT, followed by iodoacetamide to block the cysteine residues and the beads were resuspended in SDS-PAGE loading buffer and heated at 95°C for 5 min. The Protein A-Sepharose beads were spun down at 14,000 rpm for 5 min and the proteins were resolved on 10% SDS-PAGE. The gel was then cut into 8 bands followed by in-gel trypsin digestion. The resulting peptides in each of the bands were analyzed by mass spectrometry to identify the proteins.

### MS analysis of Csc3p-3xTAP and Paa1p-3xTAP

The proteins were purified as described previously and TCA precipitated followed by digestion with trypsin (Promega). The resultant peptides were subjected to 2D LC-MS/MS (liquid chromatography-tandem mass spectrometry) analysis on a Thermo LTQ as previously described [8, 9]. Thermo RAW files were converted to MZML files using Scansifter (software developed in-house at the Vanderbilt University Medical Center). Spectra with less than 20 peaks were excluded from our analysis. The *S. pombe* database (<http://www.sanger.ac.uk>, October 2009) was searched with the Myrimatch algorithm [10] v1.6.75 on a high performance computing cluster (Advanced Computing Center for Research & Education at Vanderbilt University). We added contaminant proteins (e.g. keratin, IgG) to the complete *S. pombe* database and reversed and concatenated all sequences to allow estimation of false discovery rates (10186 entries). Myrimatch parameters were as follows: strict tryptic cleavage; modification of methionine (oxidation, dynamic modification, +16 Da), S/T/Y (phosphorylation, dynamic modification, +80 Da) and cysteine (carboxamidomethylation, static modification, +57 Da) was allowed; precursor ions were required to be within 0.6 *m/z* of the peptide monoisotopic mass; fragment ions were required to fall within 0.5 *m/z* of the expected monoisotopic mass. IDPicker[11, 12] v2.6.165 was used to filter peptide matches with the following parameters: max. FDR per result 0.05, max. ambiguous IDs per result 2, min. peptide length per

result 5, min. distinct peptides per protein 3, min. additional peptides per protein group 1, minimum number of spectra per protein 3, indistinct modifications M 15.994 Da, C 57.05 Da and distinct modifications S/T/Y 80 Da. IDPicker results were processed in Excel (Microsoft®) to generate protein identification lists. Proteins identified as contaminants (e.g. keratin) or non-specific background (i.e. identified in no TAP tag negative controls or in over 50% of other unrelated TAP/LC-MS/MS analyses performed in our laboratory) were removed from the final protein list. Proteins listed in Supplemental Table 1 are the top 100 hits from Csc3-TAP or Paa1-TAP (ordered by Csc3-TAP).

### **Pull-down and Immunoblotting**

Protein extracts for the pull-down experiments were isolated as described above for the immunoprecipitation. The extract was then incubated for 1–2 h at 4°C with 20 µl of pre-swollen glutathione-sepharose 4B (Amersham Biosciences) beads equilibrated with NP40 buffer for GST tagged proteins and with IgG-sepharose (GE Healthcare) beads for 3xTAP tagged proteins. The beads were then washed six times with NP40 buffer and resuspended in SDS-PAGE loading buffer. The proteins were resolved on 8% SDS-PAGE, electroblotted onto a PVDF membrane and detected using anti-Myc antibodies (SIGMA).

To check the phosphorylation level of Cdc11p, the cells were grown to early log phase at the permissive temperature and arrested at prometaphase by incubation at 18°C for four hours. The cells were then released at 32°C for 50 min and lysed in the lysis buffer (50 mM Tris-Cl pH 8.0, 150 mM NaCl, 1% Triton X-100) containing 1 mM PMSF, 1 mM benzamidine and complete EDTA-free phosphatase inhibitor (GE Healthcare) by glass bead disruption method. The lysate was boiled in 1X SDS-PAGE loading buffer for 5 min and clarified by centrifugation at 13,000 rpm for 5 min. The supernatant was used for analyzing the level of Cdc11p phosphorylation. For phosphatase treatment, the extract was diluted 10 times and ~60 µg of the extract was treated with 40 units of the calf intestinal alkaline phosphatase (CIP) in the prescribed buffer system (New England Biolabs). The phosphorylation level was analyzed using western blot analysis by resolving the proteins on 8% SDS-PAGE.

### **Microscopy**

Septum/cell wall and DNA were stained with aniline blue (Sigma) and 4', 6-diamidino-2-phenylindole (DAPI), respectively. For immunofluorescence studies, cells were fixed with 3.7% formaldehyde for 20 min and permeabilised using PBS (3.2 mM Na<sub>2</sub>HPO<sub>4</sub>, 0.5 mM KH<sub>2</sub>PO<sub>4</sub>, 8% w/v NaCl and 0.2% w/v KCl) containing 1% triton-X100 for 2 min. Cells were washed three times with PBS and resuspended in PBS containing 1.2M sorbitol and 1.5 mg/ml lysing enzyme and 0.75 mg/ml zymolyase were added to protoplast the cells. The cells were then washed three times with PBS and blocked with PBAL buffer (PBS containing 1% albumin) for 1 hour at room temperature. Appropriate primary antibodies were added and incubated overnight at 4°C. The cells were then washed three times with PBAL and appropriate alexa 488 or alexa 594 labelled secondary antibodies were added. It was then incubated for 2 hours at room temperature, washed three times with PBAL and analyzed for the fluorescence signals. Images were captured using an Olympus IX71 microscope equipped with a Photometrics CoolSNAP ES camera. All images were processed with MetaMorph 6.1. GFP or mCherry tagged proteins were either observed directly in live cells or cells fixed for 6 min with methanol using the Olympus IX71 microscope equipped with a Photometrics CoolSNAP ES camera or spinning disk confocal microscope.

## Supplemental References

1. Moreno, S., Klar, A., and Nurse, P. (1991). Molecular genetic analysis of fission yeast *Schizosaccharomyces pombe*. *Methods Enzymol* 194, 795-823.
2. Maundrell, K. (1993). Thiamine-repressible expression vectors pREP and pRIP for fission yeast. *Gene* 123, 127-130.
3. Sambrook, J., Fritsch, E.F., and Maniatis, T. (1989). *Molecular Cloning. A laboratory manual*.
4. Keeney, J.B., and Boeke, J.D. (1994). Efficient targeted integration at *leu1-32* and *ura4-294* in *Schizosaccharomyces pombe*. *Genetics* 136, 849-856.
5. Bahler, J., Wu, J.Q., Longtine, M.S., Shah, N.G., McKenzie, A., 3rd, Steever, A.B., Wach, A., Philippsen, P., and Pringle, J.R. (1998). Heterologous modules for efficient and versatile PCR-based gene targeting in *Schizosaccharomyces pombe*. *Yeast* 14, 943-951.
6. Tang, X., Huang, J., Padmanabhan, A., Bakka, K., Bao, Y., Tan, B.Y., Cande, W.Z., and Balasubramanian, M.K. (2011). Marker reconstitution mutagenesis: a simple and efficient reverse genetic approach. *Yeast* 28, 205-212.
7. Ge, W., Chew, T.G., Wachtler, V., Naqvi, S.N., and Balasubramanian, M.K. (2005). The novel fission yeast protein Pal1p interacts with Hip1-related Sla2p/End4p and is involved in cellular morphogenesis. *Mol Biol Cell* 16, 4124-4138.
8. McDonald, W.H., Ohi, R., Miyamoto, D.T., Mitchison, T.J., and Yates, J.R., 3rd (2002). Comparison of three directly coupled HPLC MS/MS strategies for identification of proteins from complex mixtures: single-dimension LC-MS/MS, 2-phase MudPIT, and 3-phase MudPIT. *Int. J. Mass Spectrom.* 219, 245-251.
9. Roberts-Galbraith, R.H., Chen, J.S., Wang, J., and Gould, K.L. (2009). The SH3 domains of two PCH family members cooperate in assembly of the *Schizosaccharomyces pombe* contractile ring. *J Cell Biol* 184, 113-127.
10. Tabb, D.L., Fernando, C.G., and Chambers, M.C. (2007). MyriMatch: highly accurate tandem mass spectral peptide identification by multivariate hypergeometric analysis. *J Proteome Res* 6, 654-661.
11. Zhang, B., Chambers, M.C., and Tabb, D.L. (2007). Proteomic parsimony through bipartite graph analysis improves accuracy and transparency. *J Proteome Res* 6, 3549-3557.
12. Ma, Z.Q., Dasari, S., Chambers, M.C., Litton, M.D., Sobecki, S.M., Zimmerman, L.J., Halvey, P.J., Schilling, B., Drake, P.M., Gibson, B.W., et al. (2009). IDPicker 2.0: Improved protein assembly with high discrimination peptide identification filtering. *J Proteome Res* 8, 3872-3881.
13. Minet, M., Nurse, P., Thuriaux, P., and Mitchison, J.M. (1979). Uncontrolled septation in a cell division cycle mutant of the fission yeast *Schizosaccharomyces pombe*. *J Bacteriol* 137, 440-446.
14. Morrell, J.L., Tomlin, G.C., Rajagopalan, S., Venkatram, S., Feoktistova, A.S., Tasto, J.J., Mehta, S., Jennings, J.L., Link, A., Balasubramanian, M.K., et al. (2004). Sid4p-Cdc11p assembles the septation initiation network and its regulators at the *S. pombe* SPB. *Curr Biol* 14, 579-584.
15. Rosenberg, J.A., Tomlin, G.C., McDonald, W.H., Snysman, B.E., Muller, E.G., Yates, J.R., 3rd, and Gould, K.L. (2006). Ppc89 links multiple proteins, including the septation initiation network, to the core of the fission yeast spindle-pole body. *Mol Biol Cell* 17, 3793-3805.
16. Kinoshita, N., Ohkura, H., and Yanagida, M. (1990). Distinct, essential roles of type 1 and 2A protein phosphatases in the control of the fission yeast cell division cycle. *Cell* 63, 405-415.
